# Supplementary material for: Development and characterization of new tools for detecting poly(ADP-ribose) in vitro and in vivo
Source: eLife. 2022 Apr 27;11:e72464. doi: 10.7554/eLife.72464 (PMC9045816; doi:10.7554/eLife.72464)
Supplement: Supplementary file 1. [file elife-72464-supp1.xlsx]

## Sheet: Figure 8C
Vehicle	Niraparib	Parg inhibitor
0.145447	0.174536	7.81619
0.163153	0.168212	8.2715
1.77066	0.0793002	0.519815
0.975126	0.0524874	1.73272
0.985245	0.313659	14.5447
1.96037	0.054511	0.209949
	0.0884064
